# Supplementary material
Source: PubMed Central journal article supplement (PMC9427096)
Supplement: NIHMS1824664-supplement-Supplementary_Material.pdf [file NIHMS1824664-supplement-Supplementary_Material.pdf]

**How thrombomodulin enables W215A/E217A thrombin to cleave protein  
C but not fibrinogen**

Riley B. Peacock, Taylor McGrann, Sofia Zaragoza, and Elizabeth A.

Komives\*

Supplementary Figures

TFGSGEADCGLRPLFEKKSLEDKTERELLE SYIDGRIVEGSDAEIGMSPWQVMLFRKSPQELLCGASLISDRWVLTAAHCLLYPPWDKNF

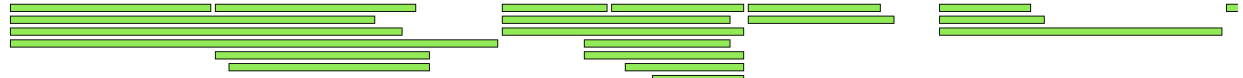

TENDLLVRI GKHSRTRYERNIEKISMLEKIYIHPRYNWREN LDRDIALMKLKKPVAFSDYIHPVCLPDRETAASLLQAGYKGRVTGWGNL

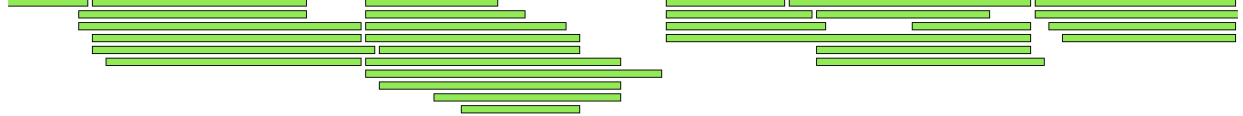

KETWTANVGKQPSVLQVVNLPIVERPVCKDSTRIRITDNMFCAGYKPDEGKRGDAEGDSGGPFVMKSPFNNRWYQMGIVSWGEGCDRD

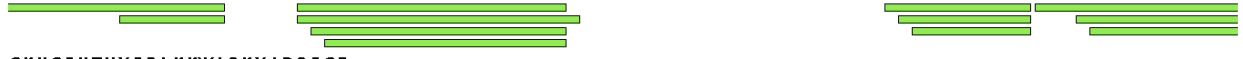

GKYGFYTHVFLKKWIQKVIDQFGE

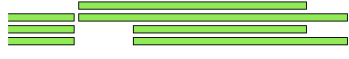

Total: 69 Peptides, 99.0% Coverage, 3.75 Redundancy

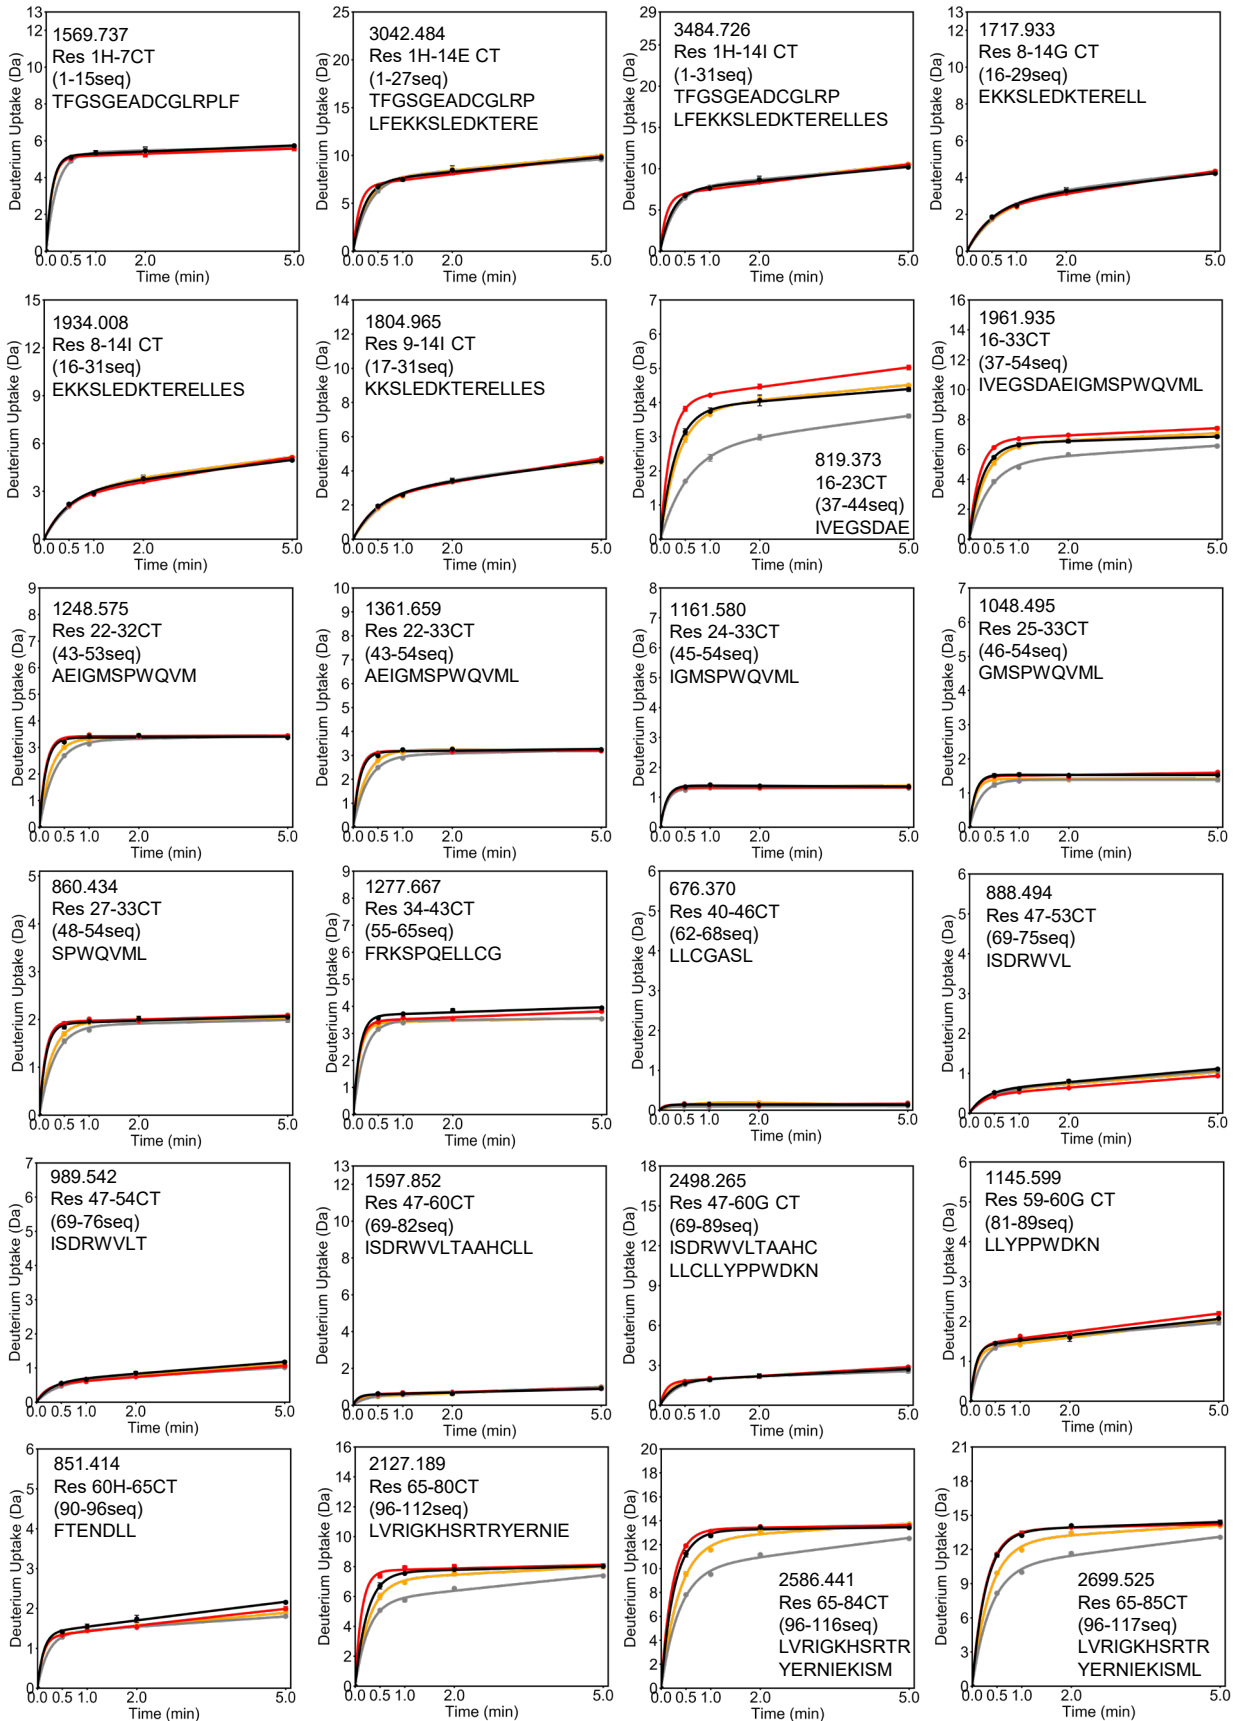

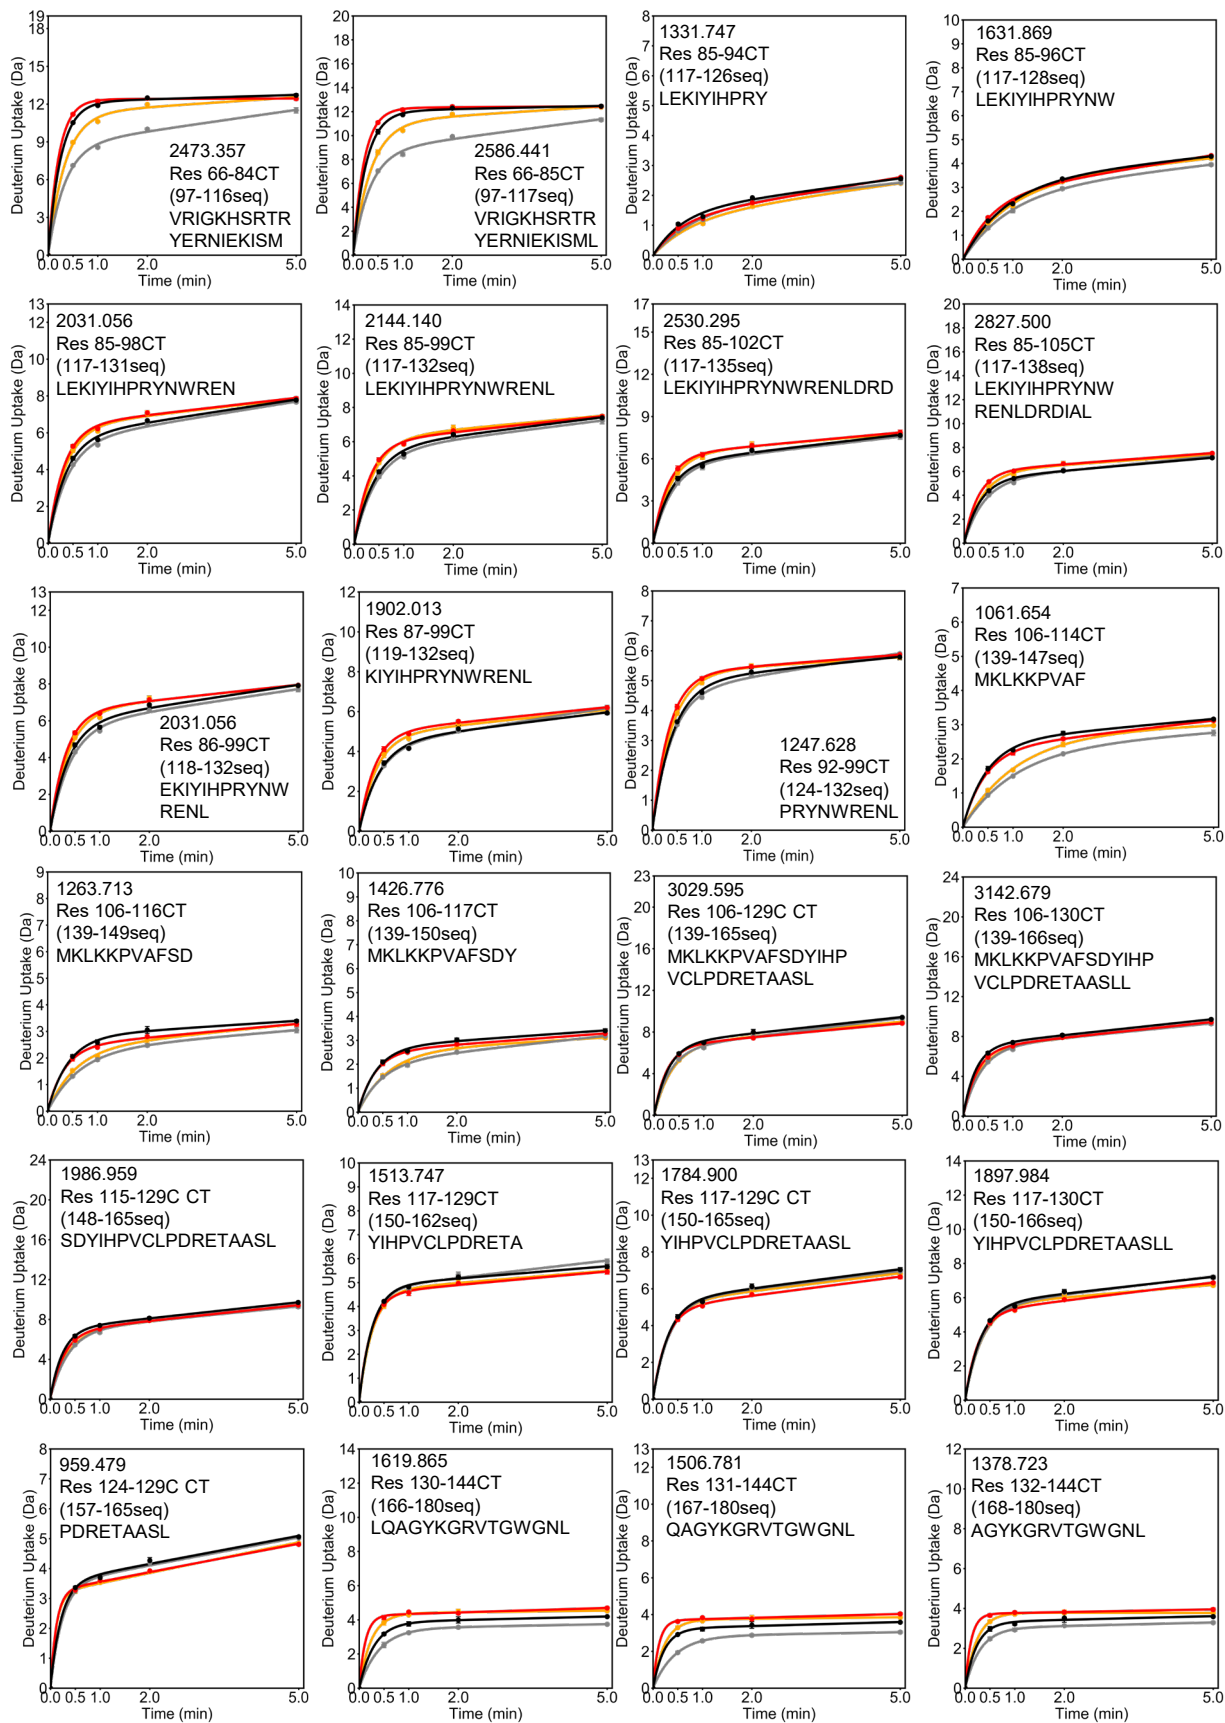

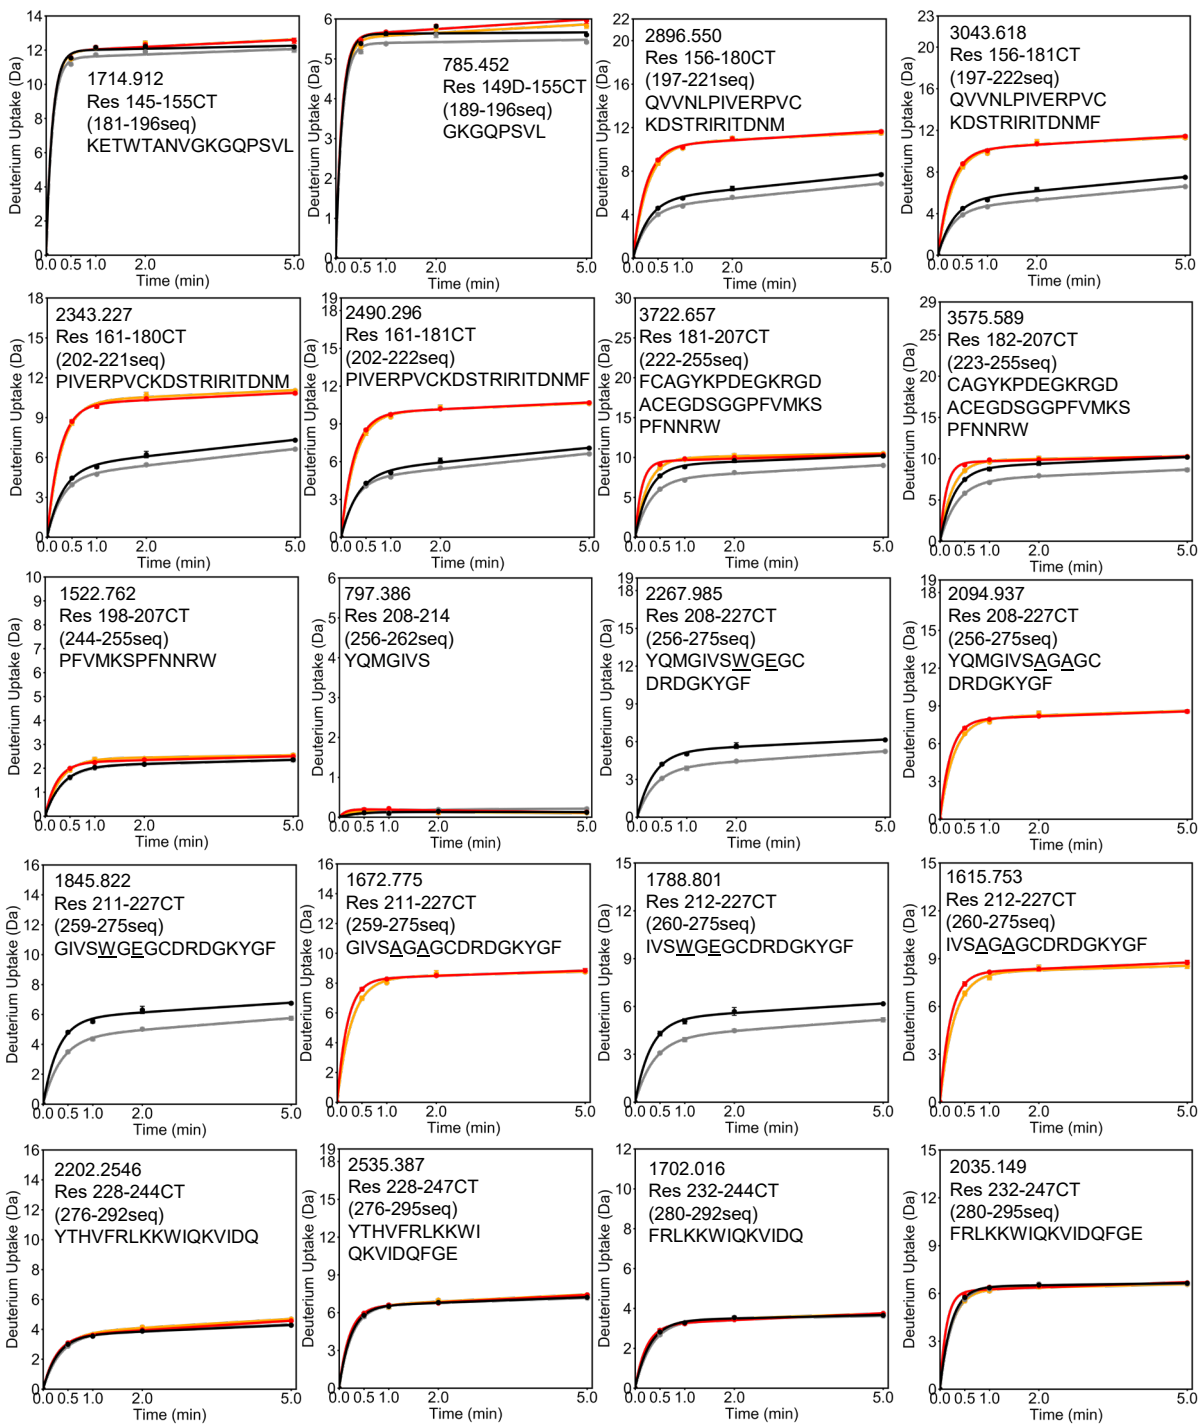

**Supplemental Figure 2:** relative deuterium uptake plots for all peptides identified through HDX-MS on WT and W215A/E217A thrombin in the presence and absence of TM456. The red and orange curves are the results from W215A/E217A thrombin in the absence and presence of TM456 respectively, and the black and grey curves are WT thrombin in the absence and presence of TM456 respectively. Each HDS timepoint was run in triplicate, and error bars are shown.
